# Recurrent Processes Emulate a Cascade of Hierarchical Decisions: Evidence from Spatio-Temporal Decoding of Human Brain Activity.

Laura Gwilliams<sup>1,2</sup>      Jean-Remi King<sup>1,3,4,5</sup>

<sup>1</sup>Department of Psychology, New York University, <sup>2</sup>NYU Abu Dhabi Institute, <sup>3</sup>Frankfurt Institute for Advanced Studies, <sup>4</sup>Ecole Normale Supérieure, <sup>5</sup>CNRS

---

## Abstract

Mounting evidence suggests that perception depends on a largely-feedforward brain network. However, the discrepancy between (i) the latency of the corresponding feedforward responses (150-200 ms) and (ii) the time it takes human subjects to recognize brief images (often >500 ms) suggests that recurrent neuronal activity is critical to visual processing. Here, we use magneto-encephalography to localize, track and decode the feedforward and recurrent responses elicited by brief presentations of variably-ambiguous letters and digits. We first confirm that these stimuli trigger, within the first 200 ms, a feedforward response in the ventral and dorsal cortical pathways. The subsequent activity is distributed across temporal, parietal and prefrontal cortices and leads to a slow and incremental cascade of representations culminating in action-specific motor signals. We introduce an analytical framework to show that these brain responses are best accounted for by a hierarchy of recurrent neural assemblies. An accumulation of computational delays across specific processing stages explains subjects' reaction times. Finally, the slow convergence of neural representations towards perceptual categories is quickly followed by all-or-none motor decision signals. Together, these results show how recurrent processes generate, over extended time periods, a cascade of hierarchical decisions that ultimately predicts subjects' perceptual reports.

*Keywords:* Perceptual decision making, Magneto-encephalography, Recurrent processes

---

## 1. Introduction

To process the rich sensory flow emanating from the retina, the brain recruits a hierarchical network originating in the primary visual areas and culminating in the infero-temporal, dorso-parietal and prefrontal cortices [1, 2, 3, 4].

In theory, the feedforward recruitment of this neural hierarchy could suffice to explain our ability to recognize visual objects. For example, recent studies demonstrate that artificial feedforward neural networks trained to categorize objects generate similar activation patterns to those elicited in the infero-temporal cortices [5, 6].

However, feedforward architectures have a fixed number of processing stages, and are thus unable to explain a number of neural and perceptual phenomena. For example, the time it takes subjects to recognize objects considerably varies from one trial to the next [7]. In addition, the neural responses to visual stimuli generally exceed the 200 ms feedforward recruitment of the

visual hierarchy [8, 9].

A large body of research shows that recurrent processing accounts for such behavioral and neural dynamics [9, 10, 11, 12, 13, 14]. In this view, recurrent processing would mainly consist in accumulating sensory evidence until a decision to act is triggered [13].

However, the precise neuronal and computational organization of recurrent processing remains unclear at the system level. In particular, how distinct recurrent assemblies implement series of hierarchical decisions remains a major unknown.

To address this issue, we use magneto-encephalography (MEG) and structural magnetic-resonance imaging (MRI) to localize, track and decode, from whole-brain activity, the feedforward (0-200ms) and recurrent processes (>200 ms) elicited by variably ambiguous characters briefly flashed on a computer screen. We show that the late and sustained neural activity distributed along the visual pathways generates, over extended time periods, a cascade of categorical

41 decisions that ultimately predicts subjects' perceptual  
42 reports.

## 43 2. Results

### 44 2.1. Subjective reports of stimulus identity are categor- 45 ical

46 To investigate the brain and computational bases of  
47 perceptual recognition, we used visual characters as de-  
48 scribed in [15]. These stimuli can be parametrically  
49 morphed between specific letters and digits by varying  
50 the contrast of their individual edges, hereafter referred  
51 to as pixels (Fig.1A-B).

52 To check that these stimuli create categorical per-  
53 cepts, we asked eight human subjects to provide contin-  
54 uous subjective reports by clicking on a disk after each  
55 stimulus presentation (Experiment 1. Fig.1A). The radi-  
56 us and the angle of the response on this disk indicated  
57 the subjective visibility and the subjective identity of  
58 the stimulus respectively. We then compared (i) the re-  
59 ported angle with (ii) the stimulus evidence (i.e. the ex-  
60 pected angle given the pixels) for each morph separately  
61 (e.g. 5-6, 6-8, etc). Subjective reports were categori-  
62 cal: cross-validated sigmoidal models better predicted  
63 subjects' responses ( $r=0.49\pm 0.05$ ,  $p=0.002$ ) than lin-  
64 ear models ( $r=0.46\pm 0.043$ ,  $p=0.002$ , sigmoid>linear:  
65  $p=0.017$  Fig.1B-C).

66 We adapted this experimental paradigm for an MEG  
67 experiment by modifying three main aspects (Experi-  
68 ment 2). First, we used stimuli that could be morphed  
69 between letters and digits, to trigger macroscopically  
70 distinguishable brain responses in the visual word form  
71 area (VWFA) and number form area (NFA) [16, 17].  
72 Second, we added two task-irrelevant flankers next to  
73 the target stimulus (Fig.1D) to increase our chances of  
74 eliciting recurrent processes via crowding [18]. Third, a  
75 new set of seventeen subjects reported subjective iden-  
76 tity via a two-alternative forced-choice button press.  
77 The identity-response mapping was orthogonal to the  
78 letter/digit category and changed on every block of 48  
79 trials. There were 1920 trials total, 320 of which were  
80 presented passively and did not require a response.

81 Perceptual reports followed a similar sigmoidal pat-  
82 tern to Experiment 1: performance was worse for  
83 more ambiguous trials (65%) as compared to unam-  
84 biguous trials (92%,  $p<0.001$ ). In addition, reaction  
85 time slightly, and consistently, increased with difficulty.  
86 For example, highly ambiguous stimuli were identified  
87 within 690 ms, whereas nonambiguous stimuli were  
88 identified within 624 ms ( $z=-21.68$ ,  $p<0.001$  (Fig.1E-  
89 F).

### 90 2.2. Neural representations are functionally organized 91 over time and space

92 Here, we aimed to decompose the sequence of de-  
93 cisions that allow subjects to transform raw visual in-  
94 put into perceptual reports. To this aim, we localized  
95 the MEG signals onto subjects' structural MRI with dy-  
96 namic statistical parametric mapping (dSPM, [19]), and  
97 morphed these source estimates onto a common brain  
98 coordinate [20, 21]. The results confirmed that the stim-  
99 uli elicited, on average, a sharp response in the primary  
100 visual areas around 70 ms, followed by a fast feedfor-  
101 ward response along the ventral and dorsal visual path-  
102 ways within the first 150-200 ms. After 200 ms, the ac-  
103 tivity appeared sustained and widely distributed across  
104 the associative cortices up until 500-600 ms after stim-  
105 ulus onset (Fig.1G and Supplementary Video 1).

106 To separate the processing stages underlying these  
107 neural responses, we applied i) mass-univariate; ii) tem-  
108 poral decoding and iii) spatial decoding analyses based  
109 on the five orthogonal features varying in our study: (1)  
110 the position of the stimulus, (2) its identity, (3) its per-  
111 ceived category, (4) its difficulty and (5) its correspond-  
112 ing button press.

113 First, we aimed to identify when and where low-level  
114 visual features would be represented in brain activity.  
115 To do so, we estimated, at each time sample separately,  
116 the ability of an l2-regularized logistic regression to pre-  
117 dict, from all MEG sensors, the position of the stimu-  
118 lus on the computer screen (left versus right). Stimulus  
119 position was decodable between 41 and 1,500 ms and  
120 peaked at 120 ms ( $AUC=0.94$ ;  $SEM=0.007$ ;  $p<0.001$   
121 as estimated with second-level non-parametric tempo-  
122 ral cluster test across subjects, (Fig.2C). These signals  
123 peaked in the early visual cortex (mean MNI ( $x=27.59$ ;  
124  $y=-74.15$ ;  $z=-1.07$ )), and propagated along the ventral  
125 and dorsal streams during the first 200 ms (Fig.2A, sup-  
126 plementary video). To summarize where stimulus po-  
127 sition was represented in the brain, we implemented  
128 'spatial decoders': l2-regularized logistic regressions fit  
129 across all time samples (0 - 1,500 ms) for each esti-  
130 mated brain source separately. Spatial decoding peaked  
131 in early visual areas and was significant across a large  
132 variety of visual and associative cortices as estimated  
133 with a second-level non-parametric spatial cluster test  
134 across subjects (Fig.2B), confirming the retinotopic or-  
135 ganization of the visual hierarchy [22, 23].

136 Second, we aimed to isolate more abstract representa-  
137 tions related to stimulus identity. Stimulus identity can  
138 be analyzed either from an objective referential (what  
139 stimulus is objectively presented?) or from a subject-  
140 ive referential (i.e. what stimulus did subjects report

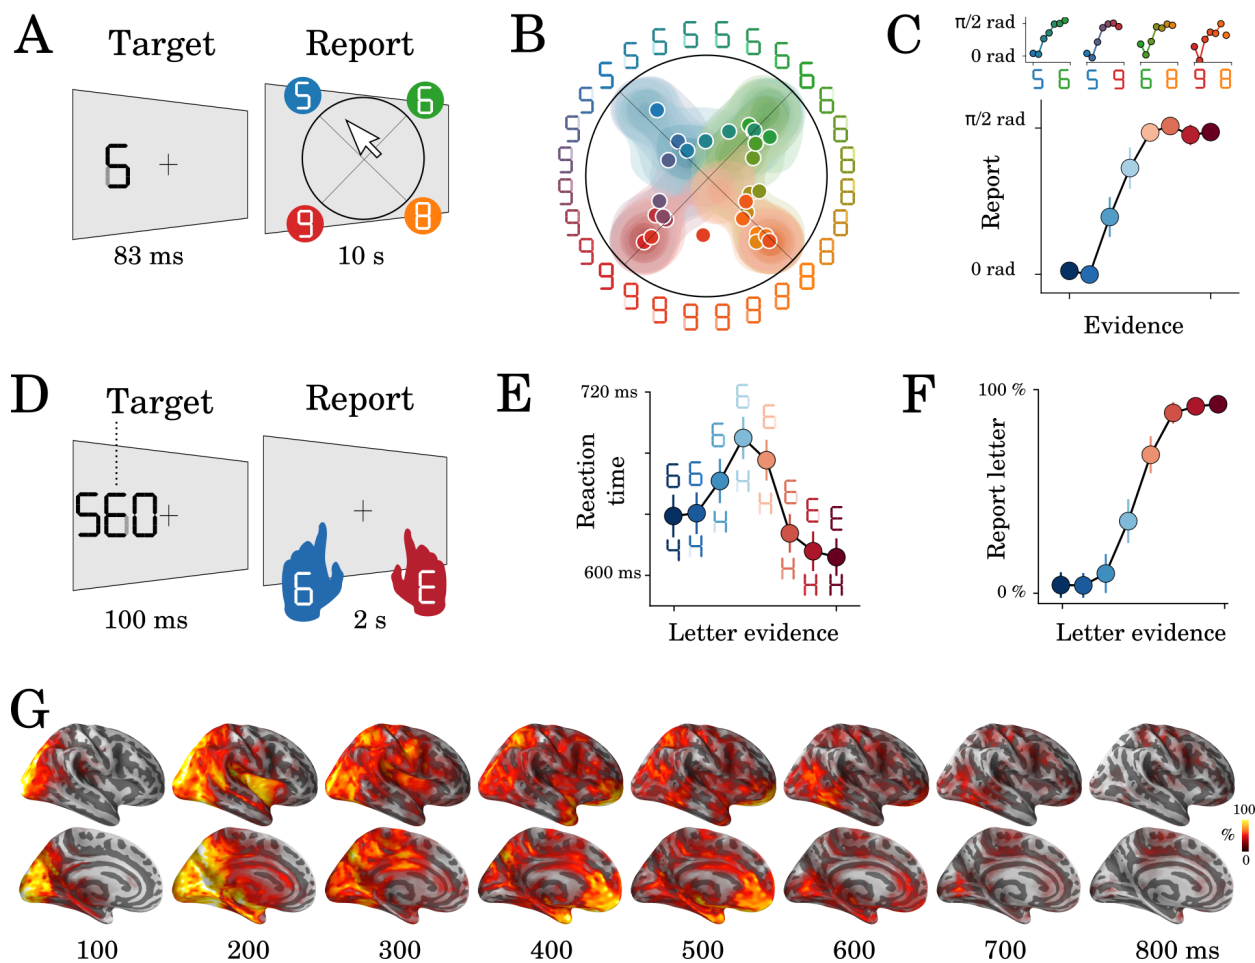

Figure 1: **Experimental protocol and behavioral results.** Experiment 1: 8 human subjects provided perceptual judgments on variably ambiguous digits briefly flashed at the center of a computer screen (A). Reports were made by clicking on a disk, where (i) the radius and (ii) the angle on the disk indicate (i) subjective visibility and (ii) subjective identity respectively. (B) Distribution (areas) and mean response (dots) location for each color-coded stimulus. (C) Top plots show the same data as B, broken down for each morph set. The x-axis indicates the expected angle given the stimulus pixels (color-coded), hereafter referred to as evidence. The y-axis indicates the angle of the mean response relative to stimulus evidence. The bottom plot shows the same data, grouped across morphs. (D) Experiment 2: 17 subjects categorized a briefly flashed and parametrically manipulated-morph using a two-alternative forced-choice. Stimulus-response mapping changed on every block. (E) Mean reaction times as a function of categorical evidence (the extent to which the stimulus objectively corresponds to a letter). (F) Mean probability of reporting a letter as a function of categorical evidence. (G) Evoked activity estimated with dSPM and estimated across all trials and all subjects. These data are also displayed in Supplementary Video 1. Error-bars indicate the standard-error-of-the-mean (SEM) across subjects.

141 having seen?). We first focus on decoding features of  
 142 the stimulus that are not ambiguous, such that subjective  
 143 and objective representations are confounded. To  
 144 this aim, we grouped stimuli along common continua  
 145 (e.g. The eight stimuli along the 4-H continuum belong  
 146 to the same morph and are here considered to share a  
 147 common identity) and fit logistic regression classifiers  
 148 across morphs (i.e. E-6 versus 4-H). The correspond-  
 149 ing stimulus identity was decodable between 120 and  
 150 845 ms and peaked at 225 ms (AUC=0.59; SEM=0.01;  
 151  $p < 0.001$ ). These effects peaked more anteriorly than

152 those of stimulus position (mean MNI:  $x=27.75$ ;  $y=-$   
 153  $62.75$ ;  $z=-1.55$ ;  $p < 0.001$ ).

154 Third, we aimed to isolate the neural signatures of  
 155 subjective perceptual categorization and thus focus on  
 156 decoding ambiguous pixels. To this aim, we grouped  
 157 stimuli based on whether the subject reported a digit  
 158 or to a letter category. Temporal decoders weakly but  
 159 significantly classified perceptual category from 150  
 160 to 940 ms after stimulus onset and peaked at 370 ms  
 161 (AUC=55%; SEM=0.01;  $p < 0.001$ , Fig.2C). The corre-  
 162 sponding sources also peaked in the inferotemporal cor-

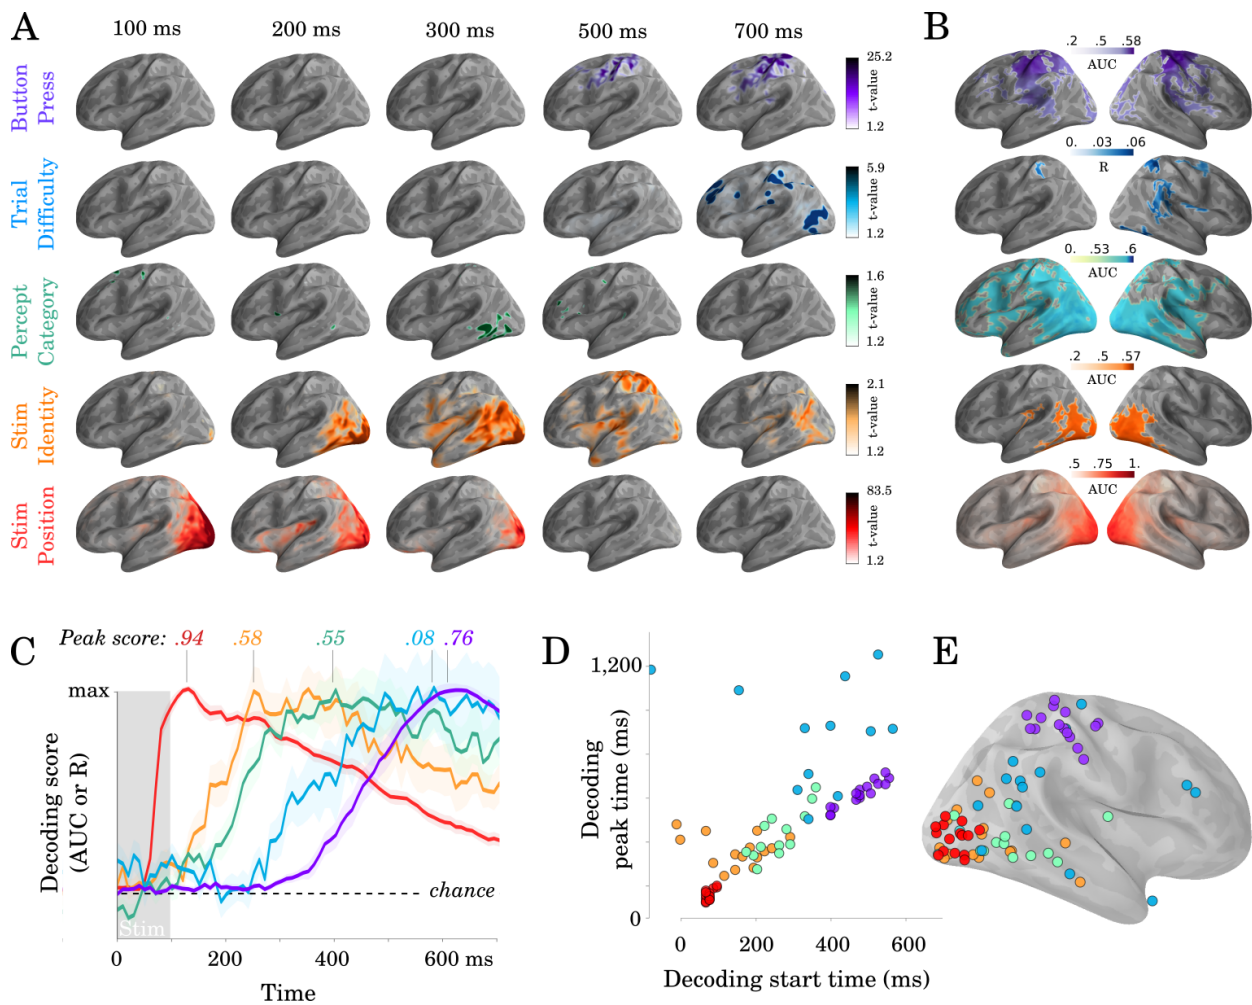

Figure 2: **Spatio-temporal hierarchy.** (A) Mass-univariate statistics. Each row plots the average-across-subjects beta coefficients obtained from regression between single-trial evoked activity and each of the five features orthogonally varying in this study. These results are displayed in Supplementary Video 2. Colors are thresholded based on t-values that exceed an uncorrected  $p < .1$ . (B) Spatial-decoders, consisting of linear models fit across all time sample for each source separately, summarize where each feature can be decoded. Lines indicate significant clusters of decoding scores across subjects. (C) Temporal-decoders, consisting of linear models fit across all MEG channels, for each time sample separately, summarize when each feature can be decoded. To highlight the sequential generation of each representation, decoding scores are normalized by their respective peaks. Additional statistics are available in Supplementary Figure 1. (D) The peak and the start of temporal decoding plotted for each subject (dot) and for each feature (color). (E) The peak spatial decoding plotted for each subject (dot) and for each feature (color).

163 tex but more anteriorly than stimulus identity ( $x=30.89$ ;  
164  $y=-35.64$ ;  $z=21.41$ ;  $p<0.01$ ). These mass-univariate ef-  
165 fects did not survive correction for multiple compar-  
166 isons (e.g. 210-320 ms:  $\bar{t}=1.79$ ,  $p=0.21$ ). Nonetheless,  
167 spatial decoders, which mitigate the trade-off between  
168 temporal specificity and the necessity to correct statisti-  
169 cal estimates for multiple comparisons, showed that  
170 perceptual category was reliably decoded from a large  
171 set of brain areas ( $\bar{t}=4.82$ ;  $p<0.001$ ; 594 significant ver-  
172 tices) (Fig.2G).

173 Importantly, when training the classifier on all ac-  
174 tive trials to distinguish letters (E/H) and digits (4/6),

175 we could significantly (max AUC= 0.55; SEM=0.011;  
176  $p<.01$ ) decode this contrast for different unambiguous  
177 tokens (A/C versus 9/8); suggesting that the response  
178 is tracking the abstract letter/digit contrast, abstracted  
179 from the specific pixel arrangement.

180 Fourth, trial difficulty (i.e. the distance between the  
181 presented stimulus and the closest unambiguous char-  
182 acter) could be decoded between 270 and 1485 ms and  
183 peaked at 590 ms (12-regularized regression fit across  
184 sensors,  $R=0.12$ ; SEM=0.024;  $p<0.01$ ). Difficulty sig-  
185 nals were localized more anteriorly than those of stimu-  
186 lus category ( $x=12.58$ ;  $y=-91.44$ ;  $z=-1.23$ ;  $p<0.01$ ).

187 While spatial decoding led to significant clusters in 237  
188 the temporal, parietal and prefrontal areas (Fig.2B), the 238  
189 peak location of stimulus difficulty was highly variable 239  
190 across subjects and included the dorso-parietal cortex, 240  
191 the temporo-parietal junction and the anterior cingulate 241  
192 cortex (Fig.2E). 242

193 Finally, temporal decoders of subjects' button press 243  
194 (left versus right index fingers) were significant from 244  
195 458 ms after stimulus onset and peaked at 604 ms 245  
196 (AUC=0.85; SEM=0.011;  $p < 0.001$ ). A significant cluster 246  
197 of motor signals could be detected around sensorimotor 247  
198 cortices between 590 and 840 ms ( $\bar{t}=4.98$ , 248  
199  $p < 0.001$ , Fig.2A). Response-lock analyses revealed 249  
200 qualitatively similar but stronger results. For example, 250  
201 temporal decoders were significant from 350 ms prior to 251  
202 the response and up to 500 ms after the response reaching 252  
203 an AUC of 94% at response time ( $p < 0.001$ ). 253

204 Overall, the time at which representations became 254  
205 maximally decodable correlated with their peak location 255  
206 along the postero-anterior axis (Fig.2D-E) ( $r=0.57$ , 256  
207  $p < 0.001$ ). These results thus strengthen the classic notion 257  
208 that perceptual processes are hierarchically organized 258  
209 across space, time and function. Importantly however, 259  
210 this cascade of representations spreads over more than 260  
211 600 ms and largely exceeds the time it takes the 261  
212 feedforward response to ignite the ventral and dorsal 262  
213 pathways (Fig.1G and Supplementary Video 1). 263

### 214 2.3. A hierarchy of recurrent layers explains the spatio- 265 215 temporal dynamics of neural representations 266

216 To clarify how a cascade of representations can be 268  
217 generated over extended time periods, we propose to 269  
218 distinguish feedforward and/or recurrent architectures 270  
219 depending on (i) the spatial location, (ii) the timing and 271  
220 (iii) the spatio-temporal dynamics of their representations 272  
221 (Fig.3). This is done by simulating different architectures, 273  
222 and assessing their similarity to the MEG data. In these models, 274  
223 we assume that each 'layer' generates new hierarchical features, 275  
224 in order to account for the organization of spatial decoders 276  
225 (Fig.2E). Furthermore, we only discuss architectures which can 277  
226 code for all representations simultaneously, in order to account 278  
227 for the overlapping temporal decoding scores (Fig.2C). 279  
228 Finally, we only model discrete activations (i.e. a representation 280  
229 is either encoded or not) as any more subtle variation can be 281  
230 trivially accounted for by signal-to-noise ratio considerations. 282

231 Each model predicts (1) 'source' decoding time 283  
232 courses (i.e. what is decodable within each layer) and 284  
233 (2) 'temporal generalization' (TG) maps. TG is used to 285  
234 characterize the dynamics of neural representations and 286  
235 287  
236 288

consists in assessing the extent to which a temporal decoder 237  
trained at a given time sample generalizes to other 238  
time samples [24] (Fig.3D). 239

Our spatial and temporal decoding results can be 240  
accounted for by a feedforward architecture that both 241  
(i) generates new representations at each layer and 242  
(ii) propagates low-level representations across layers 243  
(Fig.3 Model 1: 'broadcast'). This architecture predicts 244  
that representations would not be maintained within 245  
brain areas. This lack of maintenance is not supported 246  
by our data. First, the position of the stimulus was 247  
decodable in the early visual cortex between 248  
80-320 ms ( $\bar{t}=5.18$ ,  $p < .001$ ) and thus longer than the 249  
stimulus presentation. Second, most temporal decoders 250  
significantly generalized over several hundreds of 251  
milliseconds (Fig.4A-B). For example, the temporal 252  
decoder trained to predict stimulus position from 253  
 $t=100$ ms could accurately generalize until  $\approx 500$  ms as 254  
assessed with spatio-temporal cluster tests across subjects 255  
(Fig.4A). Similarly, temporal decoders of perceptual 256  
category and button-press generalized, on average, for 257  
287 ms (SEM=12.47;  $p < .001$ ) and 689 ms 258  
(SEM=30.94;  $p < .001$ ) respectively. Given that the neural 259  
activity underlying the decoded representations is 260  
partially stable over several hundreds of milliseconds, 261  
recurrent connections seem necessary to account our 262  
data (Fig.4 Model 2-4). 263

264 Consequently, we then considered a simple hierarchy 265  
of recurrent layers, where recurrence only maintains 266  
activated units (Fig.3 Model 2: 'maintain'). This architecture 267  
predicts strictly square TG matrices (i.e. temporal 268  
decoders would be equivalent to one another in terms of 269  
their performance) and is thus at odds with the largely 270  
diagonal TG matrices observed empirically (Fig.4A). 271  
Specifically, the duration of significant temporal decoding 272  
(fitting a new decoder at each time sample) was 273  
significantly longer than the generalization of a single 274  
decoder to subsequent time samples (e.g. 1,239 versus 275  
287 ms for perceptual category ( $t=-61.39$ ;  $p < .001$ ) 276  
and 1,215 versus 689 ms for button-press ( $t=-16.26$ ; 277  
 $p < .001$ ), Fig.4B). These results thus suggest that the 278  
decoded representations depend on dynamically-changing 279  
activity: i.e. each feature is linearly coded by partially 280  
distinct brain activity patterns at different time samples. 281

282 It is difficult to determine, with MEG alone, whether 283  
such dynamic maintenance results from a change of 284  
neural activity within or across brain areas. Indeed, 285  
Model 1 and Model 3 can equally predict diagonal TG 286  
(Fig.3). However, these two models, and their combination 287  
(Model 4) diverge in terms of *where* information should 288  
be decodable. Specifically, source analyses revealed that 289  
both stimulus position and percep-

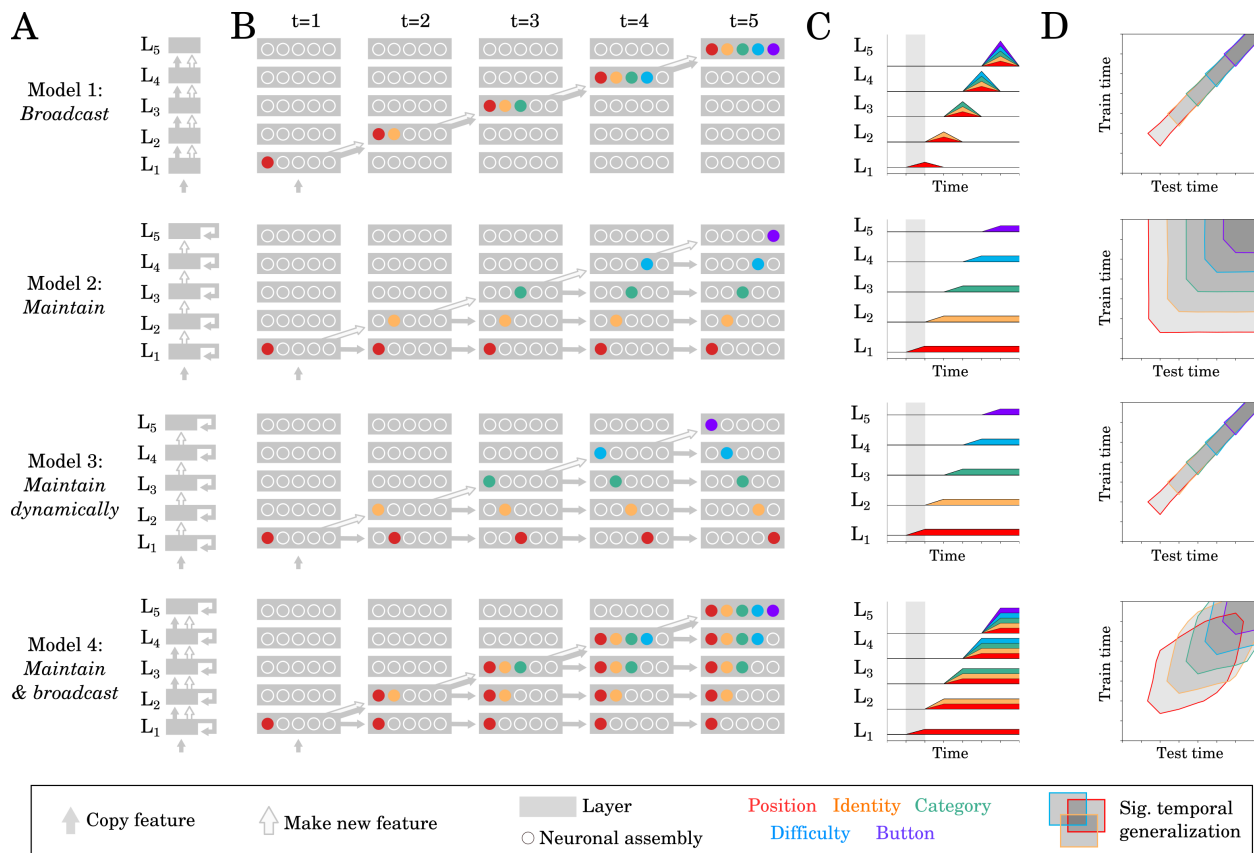

**Figure 3: Source and temporal generalization predictions for various neural architectures.** (A) Four increasingly complex neural architectures compatible with the spatial and temporal decoders of Fig.2. For each model (rows), the five layers (L1, L2 ... L5) generates new representations. The models differ in their ability to (i) propagate low-level representations across the hierarchy, (ii) maintain information with each layer in a stable or dynamic way. (B) Activations within each layer plotted at five distinct time samples. Dot slots indicate different neural assemblies within the same layer. Colors indicate which feature is linearly represented. For clarity purposes, only effective connections are plotted between different time samples. (C) Summary of the information represented within each layer across time. (D) Expected result for of the temporal generalization analyses, based on the processing dynamics of each model.

289    tual category can be decoded across a wide variety of  
 290    partially-overlapping brain areas (Fig.2B, Supplemen-  
 291    tary video 2), similarly to Model 4. Nonetheless, our  
 292    MEG study remains limited in assessing whether within  
 293    brain regions dynamics also contribute to the diagonal  
 294    TG, which would suggest a mixture between models 3  
 295    and 4.

296    Together, source and TG analyses thus suggest that  
 297    the slow and sequential generation of increasingly ab-  
 298    stract representations depends on a hierarchy of recur-  
 299    rent layers that generate, maintain and broadcast repre-  
 300    sentations across the cortex.

#### 301 2.4. Hierarchical recurrence induces an accumulation 302 of delays

303    Can a hierarchy of recurrent processes account for  
 304    single-trial dynamics? To address this issue, we hy-

305    pothesized that recurrent processes would take variable  
 306    amounts of time to converge to each intermediary rep-  
 307    resentation. In this view, (i) each feature is predicted  
 308    to propagate across brain areas at distinct moments, and  
 309    (ii) the successive rise of decodable representations is  
 310    thus predicted to incrementally correlate with reaction  
 311    times (Fig.5A-E).

312    To test this hypothesis, we estimated how the peak  
 313    of each temporal decoder varied with reaction times.  
 314    For clarity purposes, we split reaction times into four  
 315    quantiles, and averaged the time courses of temporal  
 316    decoders relative to their training time. These anal-  
 317    yses showed that the latencies of (i) perceptual cate-  
 318    gory ( $r=0.35$ ;  $p=0.006$ ), (ii) stimulus difficulty ( $r=0.37$ ;  
 319     $p=0.004$ ) and (iii) button press ( $r=0.66$ ;  $p<0.001$ ) in-  
 320    creasingly correlated with reaction times (Fig.5F-G).

321    Overall, these results show that we can track with

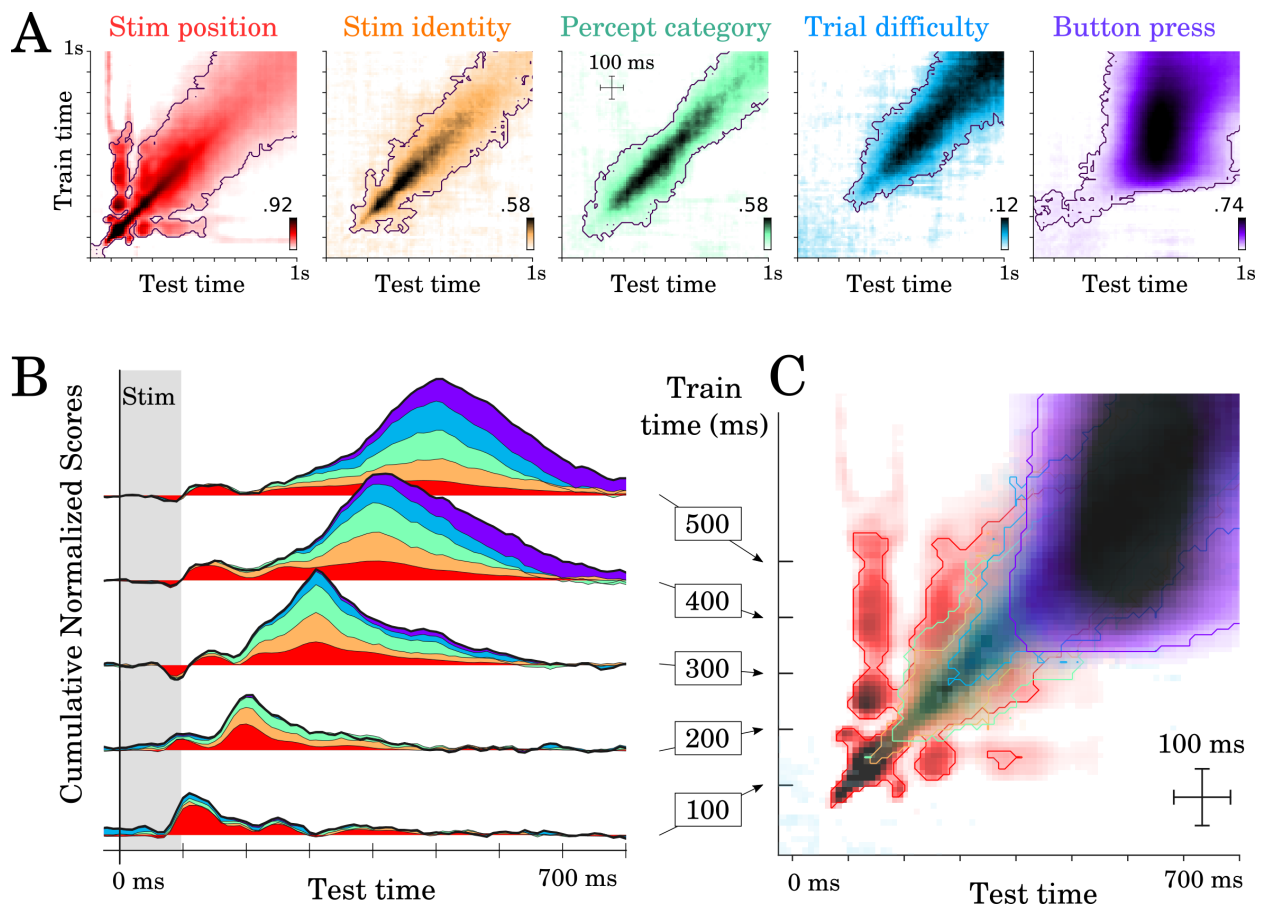

Figure 4: **Temporal generalization results.** (A) Temporal generalization for each of the five features orthogonally varying in our study. Color indicate decoding score (white=chance). Contours indicate significant decoding clusters across subjects. (B) Cumulative temporal generalization scores for the temporal decoders trained at 100, 200, 300, 400 and 500 ms respectively. These decoding scores are normalized by mean decoding peak for clarity purposes. (C) Same data as A but overlaid. For clarity purposes, contours highlight the 25th percentile of decoding performance.

322 MEG, a series of decisions generated by hierarchical  
 323 recurrent processes. This neural architecture partially  
 324 accounts for subjects' variable and relatively-slow  
 325 reaction times.

### 326 2.5. Hierarchical recurrence implements a series of all- 327 or-none decisions

328 An architecture based on successive decisions pre-  
 329 dicta a loss of ambiguous information akin to all-or-  
 330 none categorization across successive processing stages  
 331 (Fig.6A). To test this prediction, we quantified the ex-  
 332 tent to which the decoding of 'percept category' and  
 333 of 'motor action' varied linearly or categorically with  
 334 (i) categorical evidence and (ii) motor evidence respec-  
 335 tively (i.e. the extent to which the stimulus (i) objec-  
 336 tively looks like a letter or a digit and (ii) should have  
 337 led to a left or right button press given its pixels).

338 The probabilistic decoding predictions of percept cat-  
 339 egory correlated linearly with sensory evidence be-  
 340 tween 210 and 530 ms ( $r=0.38 \pm 0.03$ , temporal-cluster  
 341  $p<0.001$ ). The spatial decoders fit from 200 to 400 ms  
 342 clustered around the VWFA ( $\bar{t}=4.6$ ;  $p=.02$ ; 224 ver-  
 343 tices) (Fig 6H). These results suggest that this region  
 344 first represents the stimulus objectively (i.e. in its full  
 345 ambiguity).

346 Between 400 and 810 ms, the predictions of 'per-  
 347 ceptual category' decoders were better accounted for  
 348 by sigmoidal ( $r=0.77 \pm 0.03$ ,  $199 p<0.001$ ) than by linear  
 349 trends ( $r=0.77 \pm 0.03$ ,  $p<0.001$ ). Spatial decod-  
 350 ing analyses restricted to the 500-700 ms time window  
 351 was more distributed ( $\bar{t}=4.4$ ;  $p=.022$ ; 110 vertices). Fi-  
 352 nally, ambiguous stimuli (steps 5 and 6 on the contin-  
 353 uum) reached maximum decodability 205 ms later than  
 354 unambiguous stimuli (steps 1 and 8) ( $p<0.001$ ) (Fig.6J).  
 355 The interaction between trend (linear or sigmoidal) and

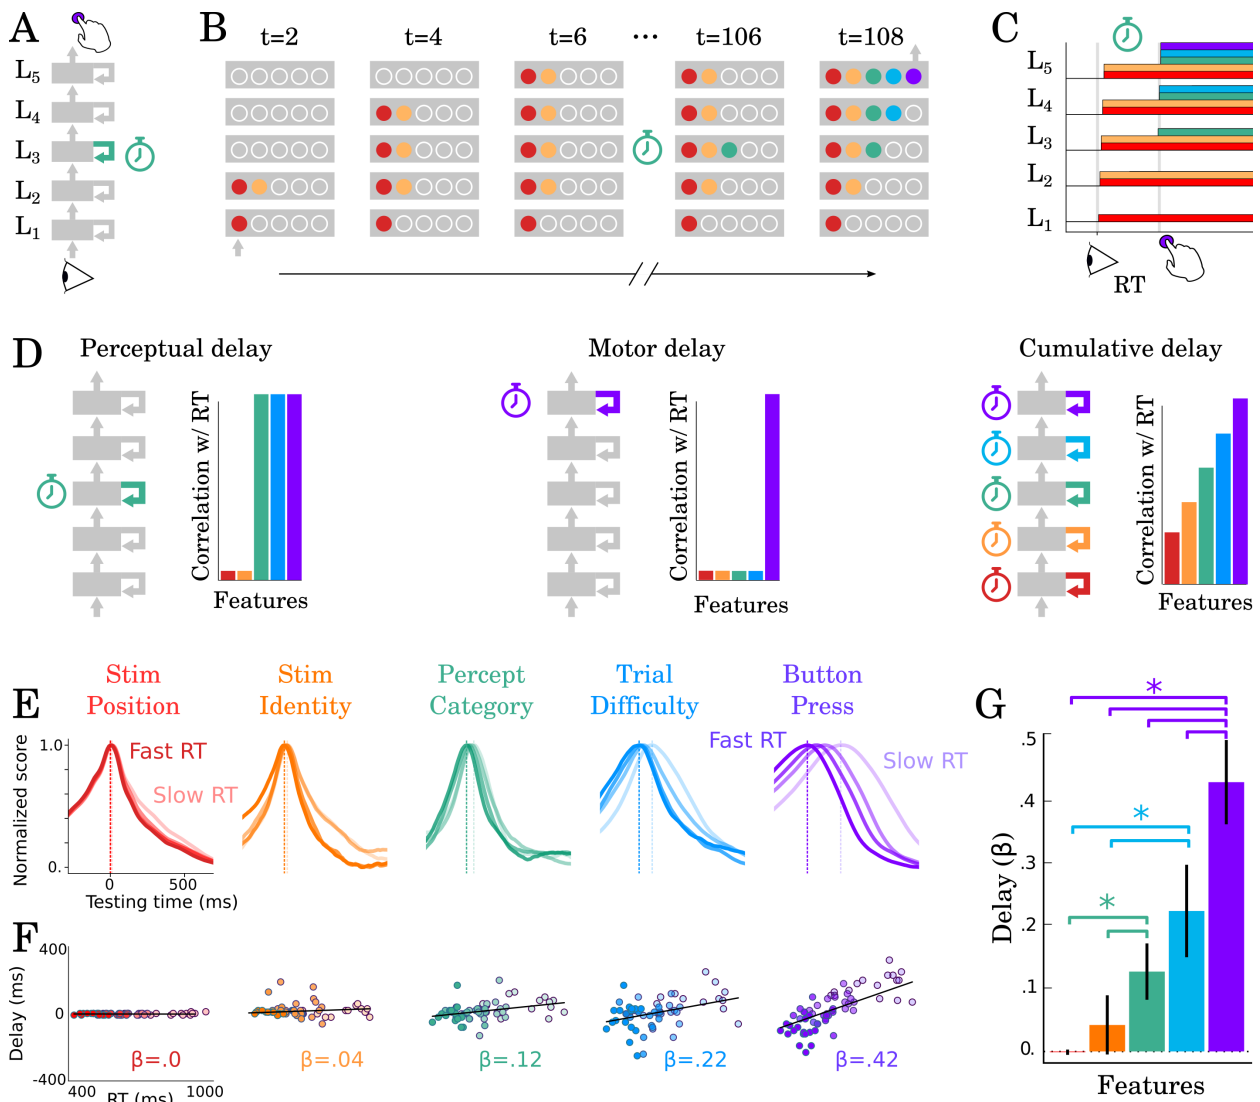

Figure 5: **Correlation between TG peaks and reaction times.** (A, B) Recurrent processing at a given processing stage is hypothesized to take a variable amount of time to generate adequate representations. (C) According to this hypothesis, the rise of the corresponding and subsequent representations would correlate with reaction times. (D, left) Predictions when delays are only induced by the perceptual stage of processing. (D, middle) Predictions when delays are only induced by the motor processing processing stage. (D, right) Predictions when delays are induced by all processing stages. (E) TG scores aligned to training time, split into trials within the fastest and slowest reaction-time quantile and averaged across reaction times bins. Dark and light lines indicate the average decoding performance for trials with fastest and slowest reaction times respectively. (F) Each subject (dot) mean peak decoding time (y-axis) as a function of reaction time (x-axis) color-coded from dark (fastest) to light (slowest). The beta coefficients indicate the average delay estimate. (G) The average slope between processing delay and reaction time for each feature. Error-bars indicate the SEM.

356 window latency was significant across subjects ( $r=0.07$ ; 364  
 357 SEM=0.01;  $p=0.002$ ).

358 This progressive categorization of the letter/digit representations contrasts with the all-or-none pattern of 366  
 359 motor signals. Specifically, the probabilistic predictions of button-press decoders varied categorically with response 367  
 360 evidence from 440 to 1,290 ms (sigmoid > linear cluster,  $\bar{t}=3.17$ ;  $p<0.001$ ). There was also a more tran- 368  
 361 362 363

364 sient linear trend from 410 to 580 ms ( $\bar{t}=3.69$ ;  $p<0.001$ ). 365  
 366 This suggests that, unlike perceptual category, motor signals largely derive from categorical inputs.

367 Together, delay (Fig.5) and categorization (Fig. 6) 368  
 369 analyses thus show that perceptual representations slowly become categorical and are subsequently fol- 370  
 370 lowed by all-or-none motor representations.



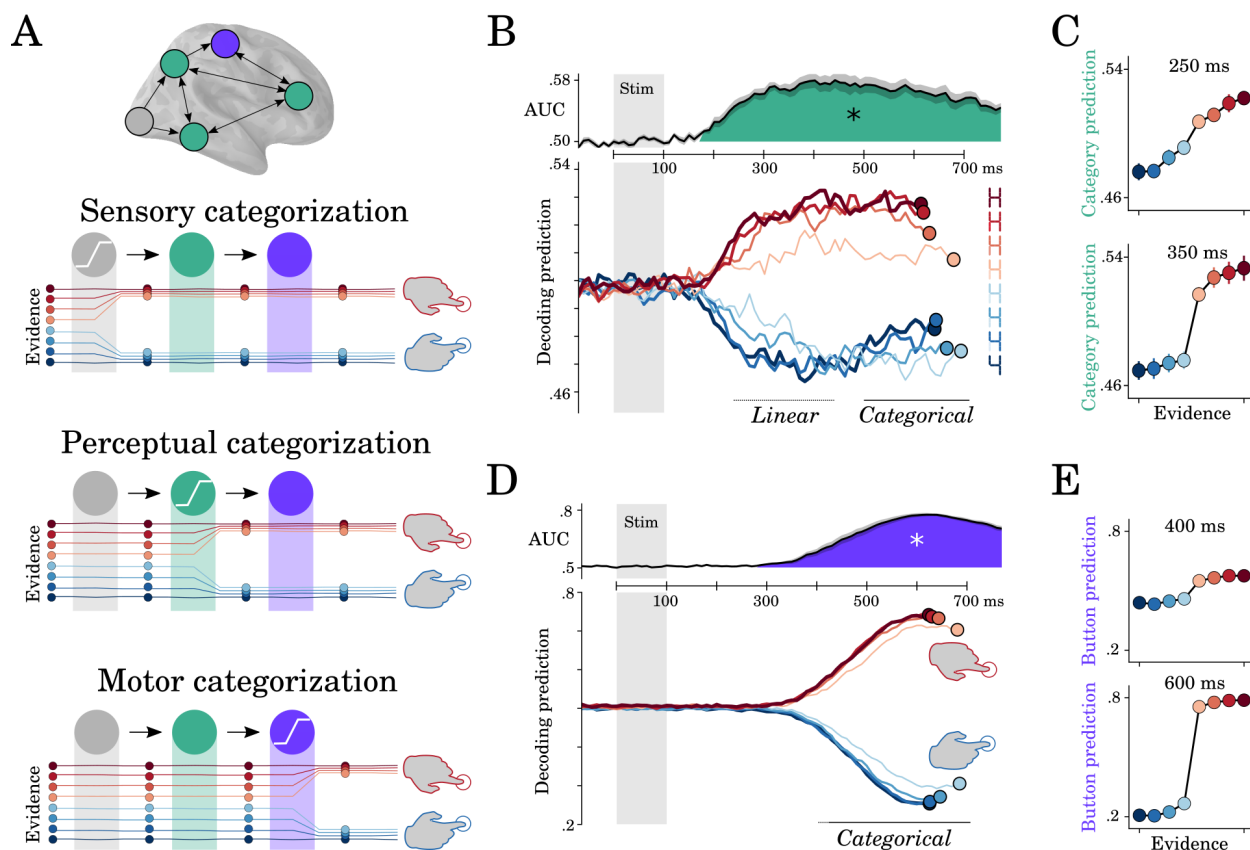

Figure 6: **Motor and perceptual decisions.** (A) Hypothesis space for when responses become categorical: during sensory, perceptual or motor processing. (B, top) Time course of decoding the perceptual decision. (B, bottom) Classifier predictions split into different levels of sensory evidence. (C) Averaging probabilities in different time-windows shows the linear-categorical shift in how information is represented. (D, top) Time course of decoding the motor decision. (D, bottom) Splitting classifier predictions into different levels of difficulty. (E) Different windows of classifier predictions, showing the categorical responses throughout processing.

### 371 3. Discussion

372 Our results show that briefly-flashed stimuli elicit a  
 373 cascade of representations that spread well beyond the  
 374 initial feedforward recruitment of the visual pathways.  
 375 A hierarchy of recurrent processes that incrementally  
 376 build representations best explains this cascade, its ac-  
 377 cumulated delays and its all-or-none categorizations.

378 While macroscopic MEG signals advantageously  
 379 give a birds-eye view of the cortical correlates of per-  
 380 ceptual decision making, it should be stressed that their  
 381 source reconstruction remains a coarse approximation.  
 382 Consequently, identifying (1) the role of subcortical ar-  
 383 eas and (2) the extent to which representations dynam-  
 384 ically change within each brain area will necessitate in-  
 385vasive brain recordings.

386 Nonetheless, our results bridge three important lines  
 387 of research on the neural and computational bases of  
 388 visual processing.

389 First, core-object recognition research, generally  
 390 based on  $\approx 100$  ms-long image presentations has repeat-  
 391 edly shown that the spiking responses of the inferotem-  
 392 poral cortex is better explained by recurrent models than  
 393 by feedforward ones [9, 14]. In particular, Kar et al have  
 394 recently shown that images that are challenging to rec-  
 395 ognize, lead to delayed content-specific spiking activity  
 396 in the macaque's infero-temporal cortex [14]. Our find-  
 397 ings, based on simpler but highly-controlled stimuli, are  
 398 consistent with these results and further highlight that  
 399 perceptual representations are not confined to the infero-  
 400 temporal cortices, but also reach a large variety of pari-  
 401 etal and prefrontal areas [25].

402 Second, the present study makes important contri-  
 403 butions to the perceptual decision making literature  
 404 [11, 13]. With some notable exceptions (e.g. [26]),  
 405 this line of research primarily aims to isolate motor and  
 406 supra-modal decision signals in the presence of sus-  
 407 tained visual inputs: i.e. neural responses ramping to-

408 wards a virtual decision threshold, independently of the 454  
409 representation on which this decision is based [13]. The 455  
410 present study complements this approach by tracking 456  
411 the representation-specific signals that slowly emerge 457  
412 after a brief stimulus. Our results thus open an 458  
413 exciting avenue for querying the gating mechanisms of 459  
414 successive decisions and clarifying the role of the pre- 460  
415 frontal areas in the coordination multiple perceptual and 461  
416 supramodal modules [27]. 462

417 Finally, our results constitute an important confirma- 463  
418 tion of modern theories of perception. In particular, the 464  
419 Global Neuronal Workspace Theory predicts that percep- 465  
420 tual representations need to be broadcast to asso- 466  
421 ciative cortices via the fronto-parietal areas to lead to 467  
422 subjective reports [8]. Yet, at some notable exceptions 468  
423 [28, 29], previous studies often fail to dissociate percep- 469  
424 tual contents and perceptual reports (e.g. [30, 31]). By 470  
425 contrast, the present experimental design allows an un- 471  
426 precedented dissection of the distinct processing stages 472  
427 that transform sensory input into perceptual represen- 473  
428 tations and, ultimately, actions. The generation of let- 474  
429 ter and digit representations in the dedicated brain areas 475  
430 [32, 17] and their subsequent broadcast to the cortex re- 476  
431 inforce the notion that subjective perception relate to the 477  
432 global sharing of content-specific representations across 478  
433 brain areas [8, 33]. 479

## 434 4. Method

### 435 4.1. Target stimuli

436 Using the font designed in [15], the stimuli were 480  
437 made from 0, 4, 5, 6, 8, 9, A, C, E, H, O, S, or from 481  
438 a linear combination of two of these characters varying 482  
439 in a single black bar (hereafter ‘pixel’). The correspond- 483  
440 ing ‘morphs’ were created by adjusting the contrast of 484  
441 the remaining pixel along eight equally spaced steps be- 485  
442 tween 0 (no bar) and 1 (black bar). 486

### 443 4.2. Experiment 1

444 Eight subjects with normal or corrected vision, seated 487  
445  $\approx 60$  cm from a 19” CRT monitor (60Hz refresh rate, res- 488  
446 olution: 1024x768), performed a stimulus identification 489  
447 task with continuous judgements across 28 variably am- 490  
448 biguous stimuli generated from digit stimuli. Ten euros 491  
449 were provided in compensation for this 1-hour experi- 492  
450 ment. 493

451 Subjects performed four blocks of 50 trials, each or- 494  
452 ganized in the following way. After a 200 ms fixation, a 495  
453 target stimulus, randomly selected from one of the 28 496

stimuli, was flashed for 83 ms on a 50% gray back-  
ground to the left or to the right of fixation. The ori-  
entation of the reporting disk (e.g 5-6-8-9 versus 5-9-  
8-6) was counterbalanced across subjects. Subjects had  
then up to 10 seconds to move a cursor on a large disk  
to report their percepts. The radius on the disk indi-  
cated subjective visibility (center=did not see the stimu-  
lus, disk border=max visibility). The angle on the disk  
indicated subjective identity (e.g. 5, 6, 8, 9 for the top  
left, top right, bottom right, and bottom left ‘corners’  
respectively). Inter-trial interval was 500 ms. To ver-  
ify that subjects provided meaningful reports, the tar-  
get stimulus was absent 15% of the trials. Absent trials  
were rated with a low visibility (i.e radius below 5%  
of the disk radius) in most cases. Absent trials and trials  
reported with a low visibility were excluded from subse-  
quent analyses. The report distribution plotted in Fig.1B  
were generated with Seaborn’s bivariate Gaussian ker-  
nel density estimate function with default parameters.

*Modeling categorical reports.* To test whether subjec-  
tive reports of stimulus identity varied linearly or cat-  
egorically with sensory evidence, we analyzed how re-  
ports’ angle (i.e. subjective identity) varied with the ex-  
pected angle given the stimulus (i.e. sensory evidence).

For each morph (5-6, 5-8, 9-8 and 6-8) separately, we  
fit a linear model:

$$\hat{y} \leftarrow \beta_1 x + \beta_0 \quad (1)$$

and a sigmoidal model:

$$\hat{y} \leftarrow \frac{1}{1 + \exp(\beta_1 x + \beta_2)} + \beta_0 \quad (2)$$

where  $\hat{y}$  is the report angle predicted by the model,  $x$   
is expected angle given the stimulus pixels and  $\beta_0$  is a  
free bias parameter.

To minimize the effects of noise, behavioral reports  
were first averaged within each level of evidence, sorted  
from the stimulus with the least pixels (e.g. 5, in 5-6  
morph) to the stimulus with the most pixels (e.g. 6 in  
the 5-6 morph). The resulting averages were normal-  
ized to range between 0 and 1 within each subject. The  
 $\beta$  parameters were fit with Scipy’s ‘curve\_fit’ function  
[34] to minimize a mean squared error across trials  $i$ :

$$\operatorname{argmin}_{\beta} \sum_i (y_i - \hat{y}_i)^2 \quad (3)$$

Because the linear and sigmoidal models have dis-  
tinct numbers of free parameters, we compared them  
within a 5-split cross-validation. Specifically, the two  
models were repeatedly fit and tested on independent

488 trials. A Pearson correlation coefficient  $r$  summarised  
489 the ability of each model to accurately predict  $y_{test}$  given  
490  $x_{train}$ ,  $y_{train}$  and  $x_{test}$ . Finally, a Wilcoxon test was ap-  
491 plied across subjects to test whether the two models  
492 were consistently above chance ( $r > 0$ ) and consistently  
493 different from one another ( $r_{sigmoid} > r_{linear}$ ).

494 *Experiment 2.* This experiment was performed at Neu-  
495 rospin, Gif sur Yvette, thanks to the support of Stanis-  
496 las Dehaene. Seventeen subjects performed a discrete  
497 identification task across 22 variably ambiguous stimuli  
498 generated from letters and digits inside an Elekta Neu-  
499 romag MEG scanner (204 planar gradiometers and 102  
500 magnetometers). Seventy euros were provided in com-  
501 pensation to the 1-hour experiment and 30 minutes of  
502 preparation.

503 Participants' head shape was digitized along with five  
504 fiducial points on the forehead and on each aural canal.  
505 Five head-position coils were placed on subjects head  
506 and localized at the beginning of each block.

507 The trial structure was as follows. A black fixation  
508 cross was displayed on a 50% gray background for 300  
509 ms followed by a 100ms-long target stimulus presented  
510 on the left or on the right of fixation. Two task-irrelevant  
511 flankers (e.g. stimulus can be read as an S or a 5) were  
512 displayed on the side of this target stimulus to increase  
513 our chances of eliciting recurrent processing via crowd-  
514 ing [18]. Subjects were given two seconds to report the  
515 identity of the stimulus. Reports of stimulus identity  
516 were given by pressing a button with the left and right  
517 index fingers respectively. The identity-button mapping  
518 changed on every block to orthogonalize the neural cor-  
519 relates of stimulus identity and the neural correlates of  
520 motor actions. For example, in block 1, perceiving an  
521 E or a 4 should have been reported with a left button  
522 press, whereas in block 2, E and 4 should have been  
523 reported with a right button press. The identity-button  
524 was explicitly reminded before each block. In addition,  
525 a visual feedback was displayed after non-ambiguous  
526 trials. Specifically, the fixation turned green for 100ms  
527 or red for 300 ms in correct and incorrect trials respec-  
528 tively. The brain responses to these feedback stimula-  
529 tions are not analyzed in the present study. Inter-trial  
530 interval was 1 second. Subjects were provided a short  
531 training to ensure they understood the task, and identi-  
532 fied non-ambiguous targets at least 80% of the time.

533 A total of 1920 trials, grouped into 40 blocks, were  
534 performed by each subject, 320 of which were presented  
535 passively at the end of each block – subjects were not  
536 required to provide a response. The trial structure was  
537 generated by (i) permuting all combinations of stimulus  
538 features (e.g. position, identity, response mapping, dif-

539 ficulty), and (ii) shuffling the order of presentation for  
540 each subject. The experiment was presented using Psy-  
541 chtoolbox [35].

542 All experiments were approved by the local ethics  
543 committee. All subjects signed an informed consent  
544 form.

### 545 4.3. Structural MRI

546 For each subject, an anatomical MRI with a resolu-  
547 tion of  $1 \times 1 \times 1.1$  mm was acquired after the MEG exper-  
548 iment with a 3T Siemens scanner. Gray and white mat-  
549 ter were segmented with Freesurfer 'recon-all' pipeline  
550 [20] and coregistered with each subject's digitized head  
551 shapes along with fiducial points.

### 552 4.4. Preprocessing

553 The continuous MEG recording was noise-reduced  
554 using Maxfilter's SSS correction on the raw data,  
555 bandpass-filtered between 0.5 and 40 Hz using MNE-  
556 Python's default parameters with firwin design [21] and  
557 downsampled to 250 Hz. Epochs were then segmented  
558 between -300 ms and +1500 ms relative to stimulus on-  
559 sets.

560 After coregistering the MEG sensor data with sub-  
561 jects' structural MRI and the head position coils, we  
562 computed the forward model using a 1-layer (inner  
563 skull) boundary element model, for each subject sep-  
564 arately and fit a minimum-norm inverse model (signal  
565 to noise ratio: 3, loose dipole fitting: 0.2, with normal  
566 orientation of the dipole relative to the cortical sheet)  
567 using the noise covariance across sensors averaged over  
568 the pre-stimulus baseline across trials. Finally, the in-  
569 verse model was applied to single-trial data resulting in  
570 a dynamic Statistical Parameter Map (dSPM) [19] value  
571 for each source at each time sample.

### 572 4.5. Modeled features

573 We investigated whether single-trial source and sen-  
574 sor evoked responses varied as a function of five fea-  
575 tures: (1) the position of the stimulus on the computer  
576 screen (left versus right of fixation), (2) the morph  
577 from which the stimulus is generated (E-6 versus H-4), (3) the  
578 category of the stimulus (letter versus digit), (4) the dif-  
579 ficulty of the trial (maximum difficulty = stimuli with  
580 pixel at 50% contrast; minimum difficult stimuli with  
581 pixels at 0% or 100% contrast), and (5) the response  
582 button used to report the stimulus (left versus right but-  
583 ton). By design, these five features are independent of  
584 one another.

585 It is challenging to dissociate brain responses that  
586 represent objective sensory information from those that

587 represent perceptual decisions as the two are generally 615  
588 collinear. To address this issue, we first fit univariate and 616  
589 multivariate models to predict perceptual category: i.e. 617  
590 whether the button press indicated a character that be- 618  
591 longs to the digit or to the letter category. This feature is 619  
592 independent of the button press (e.g. the letter E and the 620  
593 digit 4 can be reported with the same button in a given 621  
594 block). Furthermore, this feature is not necessary to per- 622  
595 form the task (i.e. knowing whether E and H are letters 623  
596 is unnecessary to discriminate them). We reasoned that 624  
597 if subjects automatically generates letter/digit represen- 625  
598 tations during perceptual categorization, then we should 626  
599 be able to track the generation of this abstract feature 627  
600 from brain activity. 628

#### 601 4.6. Mass univariate statistics 630

To estimate whether brain responses correlated with 631  
each of these five features, we first fit, within each sub- 632  
ject, mass univariate analyses at each source location 633  
and for each time sample with a linear regression: 634

$$\beta = (X^T X)^{-1} X y \quad (4) \quad 635$$

602 where  $X \in \mathbb{R}^{n \times f}$  is a design matrix of  $n$  epochs by 636  
603  $f = 5$  features and  $y \in \mathbb{R}^n$  is the univariate brain re- 637  
604 sponse at a given source and at given time. The effect 638  
605 sizes  $\beta$  were then passed to second-level statistics across 639  
606 subjects corrected for multiple comparisons using non- 640  
607 parametric spatio-temporal cluster testing (see below). 641

#### 608 4.7. Decoding 644

Decoding analyses consists in predicting each feature 645  
from multivariate brain responses. Decoding analyses 646  
were performed within a 5-split stratified K-Fold cross- 647  
validation using l2-regularized linear models. Classifiers 648  
consisted of logistic regressions (with scikit-learn 649  
[36]’s default parameters:  $C = 1$ ):

$$\operatorname{argmin}_{\beta} \sum_i \log(1 + \exp(-y_i \beta^T x_i)) + C \|\beta\|^2 \quad (5) \quad 650$$

609 where  $y_i \in \{\pm 1\}$  is the feature to be decoded at trial  $i$  651  
610 and  $x_i$  is the multivariate brain response. 652

Regressors consisted of ridge regression (with scikit- 653  
learn [36]’s default parameters:  $\alpha = 1$ ). 654

$$\operatorname{argmin}_{\beta} \sum_i (y_i \beta^T x_i)^2 + \alpha \|\beta\|^2 \quad (6) \quad 655$$

611 For each subject independently, decoding perfor- 656  
612 mance was summarized across trials, with an area under 657  
613 the curve (AUC) and a Spearman  $r$  correlation score for 658  
614 classifiers and regressors respectively. 659

All decoders were provided with data normalized by 660  
the mean and the standard deviation in the training set. 661

Spatial decoding consists in fitting a series of de- 662  
coders at each brain source independently, across all 663  
1,500 time samples relative to stimulus onset. This anal- 664  
ysis results in a decoding brain map that indicates where 665  
a feature can be linearly decoded in the brain. These 666  
decoding maps were then passed to cluster-corrected 667  
second-level statistics across subjects. 668

Temporal decoding consists in fitting a series of de- 669  
coders at each time sample independently, across all 670  
306 MEG sensors. This analysis results in a decoding 671  
time course that indicates when a feature can be lin- 672  
early decoded from MEG signals. These decoding time 673  
courses were then passed to cluster-corrected second- 674  
level statistics across subjects. 675

Temporal generalization (TG) consists in testing 676  
whether a temporal decoder fit on a training set at time 677  
 $t$  can decode a testing set at time  $t'$  [24]. TG can be 678  
summarized with a square training time  $\times$  testing time 679  
decoding matrix. To quantify the stability of neural re- 680  
presentations, we measured the duration of above-chance 681  
generalization of each temporal decoder. To quan- 682  
tify the dynamics of neural representations, we com- 683  
pared the mean duration of above-chance generaliza- 684  
tion across temporal decoders to the duration of above- 685  
chance temporal decoding (i.e. the diagonal of the ma- 686  
trix versus its rows). These two metrics were assessed 687  
within each subject and tested with second-level statis- 688  
tics across subjects. 689

#### 645 4.8. Linear versus Categorical 690

To test whether neural representations varied as a 691  
function of (i) reaction times (RTs, split into 4 quan- 692  
tiles), (ii) sensory evidence (i.e. the extent to the stim- 693  
ulus objectively corresponds to a letter) and (iii) motor 694  
evidence (i.e. whether the stimulus should have led to 695  
the left button press), we analyzed the extent to which 696  
decoders’ predictions covaried with each of these three 697  
variables  $z$ :

$$f(z, \beta^T X) \quad (7) \quad 698$$

646 where  $f$  is a linear or a sigmoidal model,  $X$  is the 699  
647 multivariate brain response and  $\beta$  is the decoder’s coef- 700  
648 ficient fit with cross-validation. 701

#### 649 4.9. Statistics 702

Univariate, decoding and TG models were fit within 703  
subjects, and tested across subjects. In case of repeated 704  
estimates (e.g. temporal decoding is repeated at each 705  
time sample), statistics derived from non-parametric 706  
cluster-testing with 10,000 permutations across subjects 707  
with MNE-Python’s default parameters [21]. 708

656 *Simulations.* To formalize how distinct neural archi-  
657 tectures lead to distinct spatio-temporal dynamics, we  
658 modeled discrete linear dynamical systems forced with  
659 a transient input  $U$ . Specifically:

$$X_{t+1} = AX_t + BU_t \quad (8)$$

660 where  $X$  is a multidimensional times series (i.e. neu-  
661 rons x time),  $A$  is the architecture, and corresponds to  
662 square connectivity matrix (i.e. neurons x neurons),  $B$   
663 is an input connectivity matrix (i.e. inputs x neurons),  
664 and  $U$  is the input vector.

665 Distinct architectures differ in the way units are con-  
666 nected with one another. For simplicity purposes, we  
667 order units in the  $A$  matrix such that their row index  
668 correspond to their hierarchical levels.

669 In this view, the recurrent, feedforward and skip con-  
670 nnections of the architecture  $A$  were modeled as a bi-  
671 nary diagonal matrix  $R$ , a shift matrix  $F$  and a matrix  
672  $S$  with 1 entries in the last column respectively. These  
673 three matrices were modulated by specific weights, as  
674 detailed below. The input  $U$  was only connected to the  
675 first "processing stage", i.e. to the first unit(s) of  $A$ , via a  
676 matrix  $B$  constant across architectures, and consisted of  
677 a transient square-wave input, that mimics the transient  
678 flash of the stimulus onto subjects' retina.

679 To model multiple features, we adopted the same pro-  
680 cedure with multiple units per layer. Each unit within  
681 each layer was forced to encode a specific feature.

682 Each architecture was fed an input at  $t=1$ , and simu-  
683 lated for 8 time steps. Finally, temporal generalization  
684 analyses based on the architectures' activations were ap-  
685 plied for each of the features.

## 686 5. Acknowledgement

687 This project received funding from the European  
688 Union's Horizon 2020 research and innovation program  
689 under grant agreement No 660086, the Bettencourt-  
690 Schueller Foundation, the Fondation Roger de Spoel-  
691 berch, the Philippe Foundation and the Abu Dhabi In-  
692 stitute G1001. We are infinitely grateful to Stanislas  
693 Dehaene for his support.

- 694 [1] Hubel, D. H. & Wiesel, T. N. Receptive fields, binocular inter- 759  
695 action and functional architecture in the cat's visual cortex. *The* 760  
696 *Journal of physiology* **160**, 106–154 (1962). 761  
697 [2] Maunsell, J. & van Essen, D. C. The connections of the mid- 762  
698 dle temporal visual area (mt) and their relationship to a cortical 763  
699 hierarchy in the macaque monkey. *Journal of Neuroscience* **3**, 764  
700 2563–2586 (1983). 765  
701 [3] Riesenhuber, M. & Poggio, T. Hierarchical models of object 766  
702 recognition in cortex. *Nature neuroscience* **2**, 1019 (1999). 767  
703 [4] DiCarlo, J. J., Zoccolan, D. & Rust, N. C. How does the brain 768  
704 solve visual object recognition? *Neuron* **73**, 415–434 (2012). 769  
705 [5] Yamins, D. L. *et al.* Performance-optimized hierarchical models 770  
706 predict neural responses in higher visual cortex. *Proceedings of* 771  
707 *the National Academy of Sciences* **111**, 8619–8624 (2014). 772  
708 [6] Schrimpf, M. *et al.* Using brain-score to evaluate and build 773  
709 neural networks for brain-like object recognition. In *Cosyne* 774  
710 *19, Date: 2019/02/28-2019/03/03, Location: Lisbon, Portugal* 775  
711 (2019). 776  
712 [7] Ratcliff, R. & Smith, P. L. A comparison of sequential sampling 777  
713 models for two-choice reaction time. *Psychological review* **111**, 778  
714 333 (2004). 779  
715 [8] Dehaene, S. & Changeux, J.-P. Experimental and theoretical ap- 780  
716 proaches to conscious processing. *Neuron* **70**, 200–227 (2011). 781  
717 [9] Lamme, V. A. & Roelfsema, P. R. The distinct modes of vision 782  
718 offered by feedforward and recurrent processing. *Trends in* 783  
719 *neurosciences* **23**, 571–579 (2000). 784  
720 [10] Gray, C. M., König, P., Engel, A. K. & Singer, W. Oscillatory 785  
721 responses in cat visual cortex exhibit inter-columnar synchron- 786  
722 ization which reflects global stimulus properties. *Nature* **338**, 787  
723 334 (1989). 788  
724 [11] Gold, J. I. & Shadlen, M. N. The neural basis of decision mak- 789  
725 ing. *Annual review of neuroscience* **30** (2007). 790  
726 [12] Shadlen, M. N. & Newsome, W. T. Neural basis of a perceptual 791  
727 decision in the parietal cortex (area lip) of the rhesus monkey. 792  
728 *Journal of neurophysiology* **86**, 1916–1936 (2001).  
729 [13] O'connell, R. G., Dockree, P. M. & Kelly, S. P. A supramodal  
730 accumulation-to-bound signal that determines perceptual deci-  
731 sions in humans. *Nature neuroscience* **15**, 1729 (2012).  
732 [14] Kar, K., Kubilius, J., Schmidt, K., Issa, E. B. & DiCarlo,  
733 J. J. Evidence that recurrent circuits are critical to the ventral  
734 stream's execution of core object recognition behavior. *Nature*  
735 *neuroscience* **22**, 974 (2019).  
736 [15] King, J.-R. & Dehaene, S. A model of subjective report and  
737 objective discrimination as categorical decisions in a vast rep-  
738 resentational space. *Philosophical Transactions of the Royal*  
739 *Society B: Biological Sciences* **369**, 20130204 (2014).  
740 [16] Dehaene, S. & Cohen, L. The unique role of the visual word  
741 form area in reading. *Trends in cognitive sciences* **15**, 254–262  
742 (2011).  
743 [17] Shum, J. *et al.* A brain area for visual numerals. *Journal of*  
744 *Neuroscience* **33**, 6709–6715 (2013).  
745 [18] Strasburger, H., Rentschler, I. & Jüttner, M. Peripheral vision  
746 and pattern recognition: A review. *Journal of vision* **11**, 13–13  
747 (2011).  
748 [19] Dale, A. M. *et al.* Dynamic statistical parametric mapping: com-  
749 bining fmri and meg for high-resolution imaging of cortical ac-  
750 tivity. *Neuron* **26**, 55–67 (2000).  
751 [20] Fischl, B. Freesurfer. *Neuroimage* **62**, 774–781 (2012).  
752 [21] Gramfort, A. *et al.* Mne software for processing meg and eeg  
753 data. *Neuroimage* **86**, 446–460 (2014).  
754 [22] Hagler Jr, D. J. & Sereno, M. I. Spatial maps in frontal and  
755 prefrontal cortex. *Neuroimage* **29**, 567–577 (2006).  
756 [23] Wandell, B. A., Dumoulin, S. O. & Brewer, A. A. Visual field  
757 maps in human cortex. *Neuron* **56**, 366–383 (2007).  
758 [24] King, J. & Dehaene, S. Characterizing the dynamics of mental  
representations: the temporal generalization method. *Trends in*  
*cognitive sciences* **18**, 203–210 (2014).  
[25] Freedman, D. J. & Miller, E. K. Neural mechanisms of visual  
categorization: insights from neurophysiology. *Neuroscience &*  
*Biobehavioral Reviews* **32**, 311–329 (2008).  
[26] Philiastides, M. G. & Sajda, P. Eeg-informed fmri reveals spa-  
tiotemporal characteristics of perceptual decision making. *Jour-  
nal of Neuroscience* **27**, 13082–13091 (2007).  
[27] Sarafyazd, M. & Jazayeri, M. Hierarchical reasoning by neural  
circuits in the frontal cortex. *Science* **364**, eaav8911 (2019).  
[28] Tong, F., Nakayama, K., Vaughan, J. T. & Kanwisher, N. Binoc-  
ular rivalry and visual awareness in human extrastriate cortex.  
*Neuron* **21**, 753–759 (1998).  
[29] King, J.-R., Pescetelli, N. & Dehaene, S. Brain mechanisms  
underlying the brief maintenance of seen and unseen sensory  
information. *Neuron* **92**, 1122–1134 (2016).  
[30] Sergent, C., Baillet, S. & Dehaene, S. Timing of the brain events  
underlying access to consciousness during the attentional blink.  
*Nature neuroscience* **8**, 1391 (2005).  
[31] Van Vugt, B. *et al.* The threshold for conscious report: Signal  
loss and response bias in visual and frontal cortex. *Science* **360**,  
537–542 (2018).  
[32] Cohen, L. *et al.* The visual word form area: spatial and temporal  
characterization of an initial stage of reading in normal subjects  
and posterior split-brain patients. *Brain* **123**, 291–307 (2000).  
[33] Lamme, V. A. Why visual attention and awareness are different.  
*Trends in cognitive sciences* **7**, 12–18 (2003).  
[34] Jones, E., Oliphant, T., Peterson, P. *et al.* SciPy:  
Open source scientific tools for Python (2001–). URL  
<http://www.scipy.org/>. [Online; accessed 10day].  
[35] Kleiner, M. *et al.* What's new in psyctoolbox-3. *Perception* **36**,  
1 (2007).  
[36] Pedregosa, F. *et al.* Scikit-learn: Machine learning in python.  
*Journal of machine learning research* **12**, 2825–2830 (2011).
